# Supplementary material
Source: PubMed Central journal article supplement (PMC3534318)

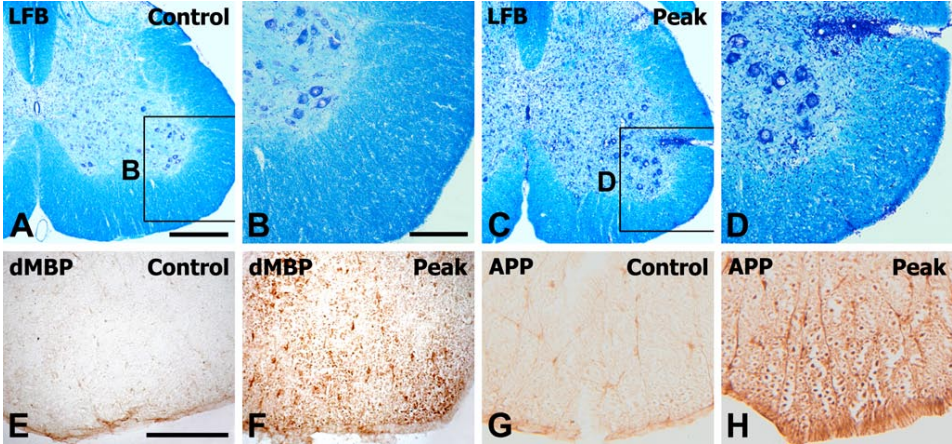

Supplemental Figure 1

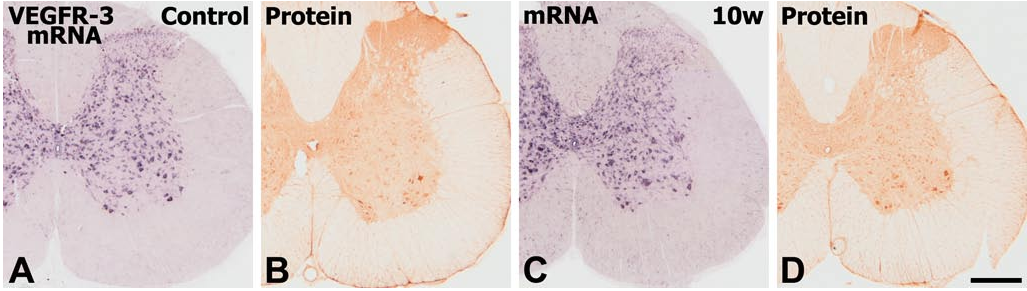

Supplemental Figure 2

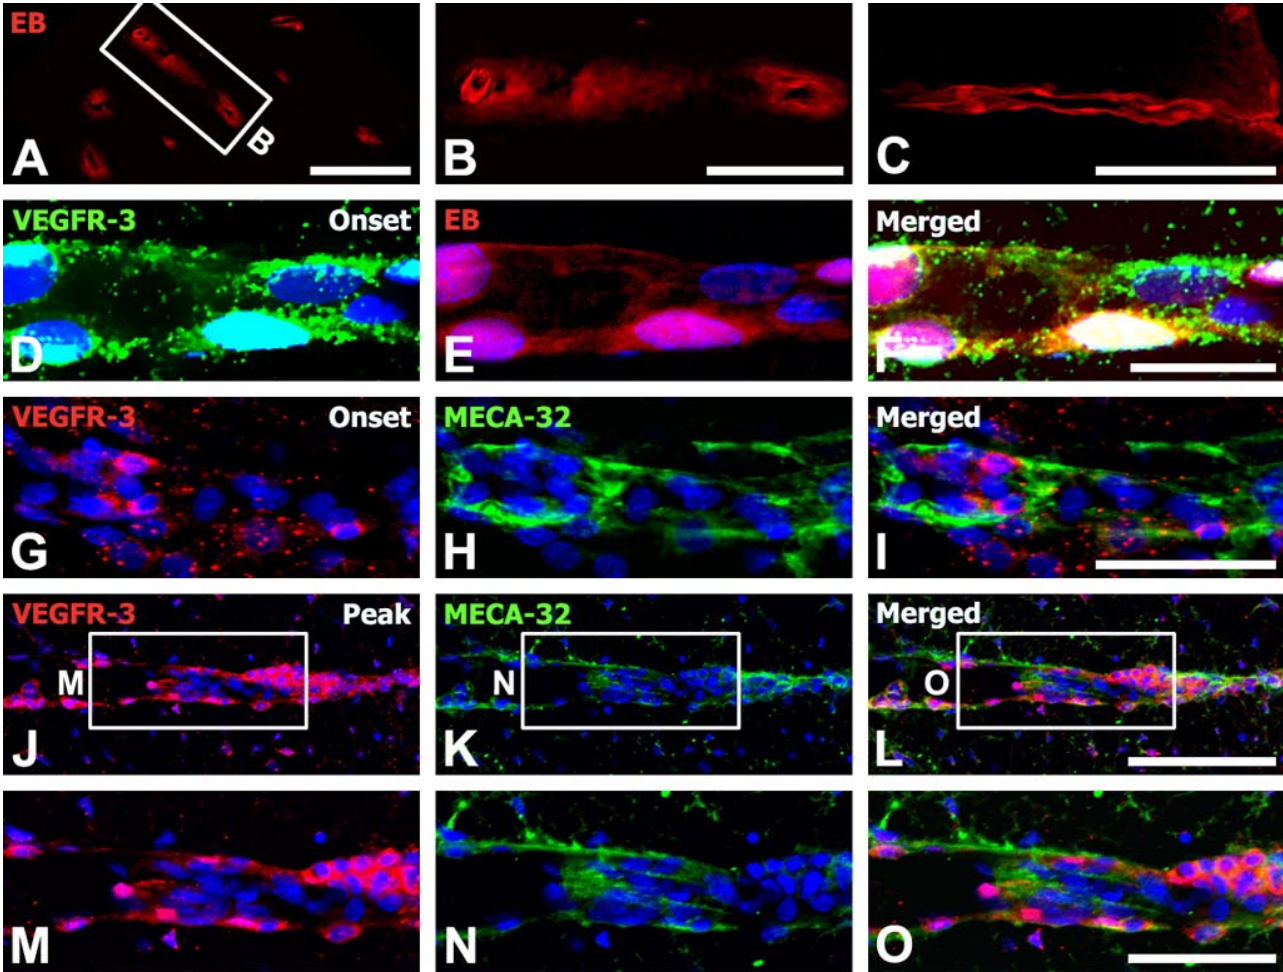

Supplemental Figure 3

Supplement: supp_0022155412462975_JHC462975_Supplemental_Material.pdf [file supp_0022155412462975_JHC462975_Supplemental_Material.pdf]
